# Supplementary material
Source: publisher figshare collection journal article supplement (https://tandf.figshare.com/articles/dataset/_/4223739)
Supplement: Supplementary file 2 [file 1]

**Supplement C: Detailed Results from Partial Least Squared Regression Relating Environmental Variables to Walleye and Yellow Perch Young-of-Year Production in Six Lakes of Northern Minnesota**

Supplemental Table S.C.1. Partial least-squares regression results for age-0 Walleye CPUE in Lake Kabetogama, Minnesota (WL = water level elevation; CV = coefficient of variation; NA = not applicable). Component loadings are equivalent to the correlation between the component and the individual variable. Loadings for components that did not improve the root mean square error (RMSE) or did not improve the percentage of variance explained in the response variables by over 5% are not shown.

| Variable                                                 | No components | Component 1 | Component 2 | Component 3 |
|----------------------------------------------------------|---------------|-------------|-------------|-------------|
| Cross-validation (RMSE, adjusted)                        | 1.02          | 0.93        | 0.99        | 1.05        |
| Cumulative percentage of variance explained (response)   | NA            | 37.0        | 51.5        | 54.0        |
| Cumulative percentage of variance explained (predictors) | NA            | 29.8        | 43.4        | 60.5        |
| Component loadings                                       |               |             |             |             |
| Adult Walleye CPUE                                       | NA            | −0.15       | −           | −           |
| Age-1+ Walleye CPUE                                      | NA            | −0.33       | −           | −           |
| Estimated Walleye biomass                                | NA            | −0.33       | −           | −           |
| Annual minimum WL                                        | NA            | 0.25        | −           | −           |
| Annual WL rise                                           | NA            | −0.22       | −           | −           |
| Mean annual WL                                           | NA            | 0.26        | −           | −           |
| Annual SD in WL                                          | NA            | −0.23       | −           | −           |
| WL from the previous summer                              | NA            | 0.04        | −           | −           |
| Overwinter decline in WL                                 | NA            | −0.24       | −           | −           |
| Early spring increase in WL                              | NA            | −0.01       | −           | −           |
| Mean WL in early spring                                  | NA            | 0.26        | −           | −           |
| SD of WL in early spring                                 | NA            | 0.00        | −           | −           |
| CV in WL in early spring                                 | NA            | 0.00        | −           | −           |
| WL at ice-out                                            | NA            | 0.28        | −           | −           |
| Annual degree-days (0°C)                                 | NA            | −0.31       | −           | −           |
| Annual degree-days (5°C)                                 | NA            | −0.32       | −           | −           |
| Annual degree-days (10°C)                                | NA            | −0.33       | −           | −           |
| Annual degree-days (15°C)                                | NA            | −0.32       | −           | −           |
| Early spring degree-days (0°C)                           | NA            | −0.10       | −           | −           |
| Early spring degree-days (5°C)                           | NA            | −0.11       | −           | −           |
| Early spring degree-days (10°C)                          | NA            | −0.13       | −           | −           |
| Early spring degree-days (15°C)                          | NA            | −0.14       | −           | −           |
| SD in maximum temperature in early spring                | NA            | −0.16       | −           | −           |
| CV in maximum temperature in early spring                | NA            | −0.07       | −           | −           |
| Time between ice-out and sampling                        | NA            | 0.01        | −           | −           |

Supplemental Table S.C.2. Partial least-squares regression results for age-0 Walleye CPUE in Lake of the Woods (WL = water level elevation; CV = coefficient of variation; NA = not applicable). Component loadings are equivalent to the correlation between the component and the individual variable. Loadings for components that did not improve the root mean square error (RMSE) or did not improve the percentage of variance explained in the response variables by over 5% are not shown.

| Variable                                                 | No components | Component 1 | Component 2 | Component 3 |
|----------------------------------------------------------|---------------|-------------|-------------|-------------|
| Cross-validation (RMSE, adjusted)                        | 1.03          | 1.22        | 1.28        | 1.59        |
| Cumulative percentage of variance explained (response)   | NA            | 37.7        | 48.7        | 60.3        |
| Cumulative percentage of variance explained (predictors) | NA            | 16.6        | 31.0        | 40.4        |
| <b>Component loadings</b>                                |               |             |             |             |
| Adult Walleye CPUE                                       | NA            | –           | –           | –           |
| Age-1+ Walleye CPUE                                      | NA            | –           | –           | –           |
| Estimated Walleye biomass                                | NA            | –           | –           | –           |
| Annual minimum WL                                        | NA            | –           | –           | –           |
| Annual WL rise                                           | NA            | –           | –           | –           |
| Mean annual WL                                           | NA            | –           | –           | –           |
| Annual SD in WL                                          | NA            | –           | –           | –           |
| WL from the previous summer                              | NA            | –           | –           | –           |
| Overwinter decline in WL                                 | NA            | –           | –           | –           |
| Early spring increase in WL                              | NA            | –           | –           | –           |
| Mean WL in early spring                                  | NA            | –           | –           | –           |
| SD of WL in early spring                                 | NA            | –           | –           | –           |
| CV in WL in early spring                                 | NA            | –           | –           | –           |
| WL at ice-out                                            | NA            | –           | –           | –           |
| Annual degree-days (0°C)                                 | NA            | –           | –           | –           |
| Annual degree-days (5°C)                                 | NA            | –           | –           | –           |
| Annual degree-days (10°C)                                | NA            | –           | –           | –           |
| Annual degree-days (15°C)                                | NA            | –           | –           | –           |
| Early spring degree-days (0°C)                           | NA            | –           | –           | –           |
| Early spring degree-days (5°C)                           | NA            | –           | –           | –           |
| Early spring degree-days (10°C)                          | NA            | –           | –           | –           |
| Early spring degree-days (15°C)                          | NA            | –           | –           | –           |
| SD in maximum temperature in early spring                | NA            | –           | –           | –           |
| CV in maximum temperature in early spring                | NA            | –           | –           | –           |
| Time between ice-out and sampling                        | NA            | –           | –           | –           |

Supplemental Table S.C.3. Partial least-squares regression results for age-0 Walleye CPUE in Leech Lake (WL = water level elevation; CV = coefficient of variation; NA = not applicable). Component loadings are equivalent to the correlation between the component and the individual variable. Loadings for components that did not improve the root mean square error (RMSE) or did not improve the percentage of variance explained in the response variables by over 5% are not shown.

| Variable                                                 | No components | Component 1 | Component 2 | Component 3 |
|----------------------------------------------------------|---------------|-------------|-------------|-------------|
| Cross-validation (RMSE, adjusted)                        | 1.03          | 1.14        | 1.40        | 1.30        |
| Cumulative percentage of variance explained (response)   | NA            | 27.8        | 52.7        | 67.0        |
| Cumulative percentage of variance explained (predictors) | NA            | 25.6        | 37.4        | 50.1        |
| <b>Component loadings</b>                                |               |             |             |             |
| Adult Walleye CPUE                                       | NA            | –           | –           | –           |
| Age-1+ Walleye CPUE                                      | NA            | –           | –           | –           |
| Estimated Walleye biomass                                | NA            | –           | –           | –           |
| Annual minimum WL                                        | NA            | –           | –           | –           |
| Annual WL rise                                           | NA            | –           | –           | –           |
| Mean annual WL                                           | NA            | –           | –           | –           |
| Annual SD in WL                                          | NA            | –           | –           | –           |
| WL from the previous summer                              | NA            | –           | –           | –           |
| Overwinter decline in WL                                 | NA            | –           | –           | –           |
| Early spring increase in WL                              | NA            | –           | –           | –           |
| Mean WL in early spring                                  | NA            | –           | –           | –           |
| SD of WL in early spring                                 | NA            | –           | –           | –           |
| CV in WL in early spring                                 | NA            | –           | –           | –           |
| WL at ice-out                                            | NA            | –           | –           | –           |
| Annual degree-days (0°C)                                 | NA            | –           | –           | –           |
| Annual degree-days (5°C)                                 | NA            | –           | –           | –           |
| Annual degree-days (10°C)                                | NA            | –           | –           | –           |
| Annual degree-days (15°C)                                | NA            | –           | –           | –           |
| Early spring degree-days (0°C)                           | NA            | –           | –           | –           |
| Early spring degree-days (5°C)                           | NA            | –           | –           | –           |
| Early spring degree-days (10°C)                          | NA            | –           | –           | –           |
| Early spring degree-days (15°C)                          | NA            | –           | –           | –           |
| SD in maximum temperature in early spring                | NA            | –           | –           | –           |
| CV in maximum temperature in early spring                | NA            | –           | –           | –           |
| Time between ice-out and sampling                        | NA            | –           | –           | –           |

Supplemental Table S.C.4. Partial least-squares regression results for age-0 Walleye CPUE in Rainy Lake (WL = water level elevation; CV = coefficient of variation; NA = not applicable). Component loadings are equivalent to the correlation between the component and the individual variable. Loadings for components that did not improve the root mean square error (RMSE) or did not improve the percentage of variance explained in the response variables by over 5% are not shown.

| Variable                                                 | No components | Component 1 | Component 2 | Component 3 |
|----------------------------------------------------------|---------------|-------------|-------------|-------------|
| Cross-validation (RMSE, adjusted)                        | 1.02          | 0.93        | 0.94        | 0.93        |
| Cumulative percentage of variance explained (response)   | NA            | 50.3        | 66.8        | 70.8        |
| Cumulative percentage of variance explained (predictors) | NA            | 25.2        | 38.4        | 56.9        |
| <b>Component loadings</b>                                |               |             |             |             |
| Adult Walleye CPUE                                       | NA            | 0.03        | –           | –           |
| Age-1+ Walleye CPUE                                      | NA            | 0.11        | –           | –           |
| Estimated Walleye biomass                                | NA            | 0.08        | –           | –           |
| Annual minimum WL                                        | NA            | 0.08        | –           | –           |
| Annual WL rise                                           | NA            | 0.10        | –           | –           |
| Mean annual WL                                           | NA            | 0.20        | –           | –           |
| Annual SD in WL                                          | NA            | 0.02        | –           | –           |
| WL from the previous summer                              | NA            | –0.01       | –           | –           |
| Overwinter decline in WL                                 | NA            | –0.18       | –           | –           |
| Early spring increase in WL                              | NA            | 0.22        | –           | –           |
| Mean WL in early spring                                  | NA            | 0.24        | –           | –           |
| SD of WL in early spring                                 | NA            | 0.22        | –           | –           |
| CV in WL in early spring                                 | NA            | 0.22        | –           | –           |
| WL at ice-out                                            | NA            | 0.23        | –           | –           |
| Annual degree-days (0°C)                                 | NA            | –0.32       | –           | –           |
| Annual degree-days (5°C)                                 | NA            | –0.35       | –           | –           |
| Annual degree-days (10°C)                                | NA            | –0.35       | –           | –           |
| Annual degree-days (15°C)                                | NA            | –0.33       | –           | –           |
| Early spring degree-days (0°C)                           | NA            | –0.26       | –           | –           |
| Early spring degree-days (5°C)                           | NA            | –0.26       | –           | –           |
| Early spring degree-days (10°C)                          | NA            | –0.28       | –           | –           |
| Early spring degree-days (15°C)                          | NA            | –0.28       | –           | –           |
| SD in maximum temperature in early spring                | NA            | –0.18       | –           | –           |
| CV in maximum temperature in early spring                | NA            | 0.05        | –           | –           |
| Time between ice-out and sampling                        | NA            | 0.02        | –           | –           |

Supplemental Table S.C.5. Partial least-squares regression results for age-0 Walleye CPUE in Lake Vermilion (WL = water level elevation; CV = coefficient of variation; NA = not applicable). Component loadings are equivalent to the correlation between the component and the individual variable. Loadings for components that did not improve the root mean square error (RMSE) or did not improve the percentage of variance explained in the response variables by over 5% are not shown.

| Variable                                                 | No components | Component 1 | Component 2 | Component 3 |
|----------------------------------------------------------|---------------|-------------|-------------|-------------|
| Cross-validation (RMSE, adjusted)                        | 1.04          | 0.75        | 0.56        | 0.52        |
| Cumulative percentage of variance explained (response)   | NA            | 76.2        | 92.6        | 94.6        |
| Cumulative percentage of variance explained (predictors) | NA            | 20.2        | 35.7        | 62.5        |
| <b>Component loadings</b>                                |               |             |             |             |
| Adult Walleye CPUE                                       | NA            | −0.06       | 0.23        | −           |
| Age-1+ Walleye CPUE                                      | NA            | −0.25       | 0.32        | −           |
| Estimated Walleye biomass                                | NA            | −0.20       | 0.37        | −           |
| Annual minimum WL                                        | NA            | 0.25        | −0.18       | −           |
| Annual WL rise                                           | NA            | 0.10        | −0.10       | −           |
| Mean annual WL                                           | NA            | 0.25        | −0.07       | −           |
| Annual SD in WL                                          | NA            | 0.09        | −0.03       | −           |
| WL from the previous summer                              | NA            | −0.07       | −0.35       | −           |
| Overwinter decline in WL                                 | NA            | −0.28       | −0.06       | −           |
| Early spring increase in WL                              | NA            | 0.11        | −0.34       | −           |
| Mean WL in early spring                                  | NA            | 0.28        | −0.19       | −           |
| SD of WL in early spring                                 | NA            | 0.08        | −0.37       | −           |
| CV in WL in early spring                                 | NA            | 0.08        | −0.37       | −           |
| WL at ice-out                                            | NA            | 0.23        | −0.13       | −           |
| Annual degree-days (0°C)                                 | NA            | −0.30       | 0.10        | −           |
| Annual degree-days (5°C)                                 | NA            | −0.33       | 0.10        | −           |
| Annual degree-days (10°C)                                | NA            | −0.37       | 0.08        | −           |
| Annual degree-days (15°C)                                | NA            | −0.41       | 0.06        | −           |
| Early spring degree-days (0°C)                           | NA            | −0.04       | 0.23        | −           |
| Early spring degree-days (5°C)                           | NA            | 0.07        | 0.20        | −           |
| Early spring degree-days (10°C)                          | NA            | 0.04        | 0.20        | −           |
| Early spring degree-days (15°C)                          | NA            | 0.04        | 0.19        | −           |
| SD in maximum temperature in early spring                | NA            | −0.20       | −0.04       | −           |
| CV in maximum temperature in early spring                | NA            | −0.31       | −0.13       | −           |
| Time between ice-out and sampling                        | NA            | −0.16       | −0.14       | −           |

Supplemental Table S.C.6. Partial least-squares regression results for age-0 Walleye CPUE in Lake Winnibigoshish (WL = water level elevation; CV = coefficient of variation; NA = not applicable). Component loadings are equivalent to the correlation between the component and the individual variable. Loadings for components that did not improve the root mean square error (RMSE) or did not improve the percentage of variance explained in the response variables by over 5% are not shown.

| Variable                                                 | No components | Component 1 | Component 2 | Component 3 |
|----------------------------------------------------------|---------------|-------------|-------------|-------------|
| Cross-validation (RMSE, adjusted)                        | 1.05          | 0.97        | 1.02        | 1.14        |
| Cumulative percentage of variance explained (response)   | NA            | 63.6        | 78.4        | 88.0        |
| Cumulative percentage of variance explained (predictors) | NA            | 31.4        | 58.0        | 70.2        |
| <b>Component loadings</b>                                |               |             |             |             |
| Adult Walleye CPUE                                       | NA            | −0.21       | –           | –           |
| Age-1+ Walleye CPUE                                      | NA            | −0.29       | –           | –           |
| Estimated Walleye biomass                                | NA            | −0.20       | –           | –           |
| Annual minimum WL                                        | NA            | −0.13       | –           | –           |
| Annual WL rise                                           | NA            | 0.16        | –           | –           |
| Mean annual WL                                           | NA            | 0.25        | –           | –           |
| Annual SD in WL                                          | NA            | 0.21        | –           | –           |
| WL from the previous summer                              | NA            | 0.25        | –           | –           |
| Overwinter decline in WL                                 | NA            | 0.12        | –           | –           |
| Early spring increase in WL                              | NA            | 0.08        | –           | –           |
| Mean WL in early spring                                  | NA            | 0.02        | –           | –           |
| SD of WL in early spring                                 | NA            | 0.05        | –           | –           |
| CV in WL in early spring                                 | NA            | 0.05        | –           | –           |
| WL at ice-out                                            | NA            | −0.01       | –           | –           |
| Annual degree-days (0°C)                                 | NA            | −0.37       | –           | –           |
| Annual degree-days (5°C)                                 | NA            | −0.38       | –           | –           |
| Annual degree-days (10°C)                                | NA            | −0.38       | –           | –           |
| Annual degree-days (15°C)                                | NA            | −0.36       | –           | –           |
| Early spring degree-days (0°C)                           | NA            | −0.31       | –           | –           |
| Early spring degree-days (5°C)                           | NA            | −0.22       | –           | –           |
| Early spring degree-days (10°C)                          | NA            | −0.13       | –           | –           |
| Early spring degree-days (15°C)                          | NA            | 0.15        | –           | –           |
| SD in maximum temperature in early spring                | NA            | 0.22        | –           | –           |
| CV in maximum temperature in early spring                | NA            | 0.13        | –           | –           |
| Time between ice-out and sampling                        | NA            | 0.00        | –           | –           |

Supplemental Table S.C.7. Partial least-squares regression results for age-0 Yellow Perch CPUE in Lake Kabetogama (WL = water level elevation; CV = coefficient of variation; NA = not applicable). Component loadings are equivalent to the correlation between the component and the individual variable. Loadings for components that did not improve the root mean square error (RMSE) or did not improve the percentage of variance explained in the response variables by over 5% are not shown.

| Variable                                                 | No components | Component 1 | Component 2 | Component 3 |
|----------------------------------------------------------|---------------|-------------|-------------|-------------|
| Cross-validation (RMSE, adjusted)                        | 1.02          | 0.93        | 1.03        | 1.04        |
| Cumulative percentage of variance explained (response)   | NA            | 42.3        | 53.8        | 61.7        |
| Cumulative percentage of variance explained (predictors) | NA            | 29.2        | 41.5        | 55.0        |
| <b>Component loadings</b>                                |               |             |             |             |
| Adult Walleye CPUE                                       | NA            | 0.16        | –           | –           |
| Age-1+ Walleye CPUE                                      | NA            | 0.18        | –           | –           |
| Annual minimum WL                                        | NA            | 0.29        | –           | –           |
| Annual WL rise                                           | NA            | –0.25       | –           | –           |
| Mean annual WL                                           | NA            | 0.28        | –           | –           |
| Annual SD in WL                                          | NA            | –0.27       | –           | –           |
| WL from the previous summer                              | NA            | 0.04        | –           | –           |
| Overwinter decline in WL                                 | NA            | –0.24       | –           | –           |
| Early spring increase in WL                              | NA            | 0.06        | –           | –           |
| Mean WL in early spring                                  | NA            | 0.26        | –           | –           |
| SD of WL in early spring                                 | NA            | 0.07        | –           | –           |
| CV in WL in early spring                                 | NA            | 0.07        | –           | –           |
| WL at ice-out                                            | NA            | 0.26        | –           | –           |
| Annual degree-days (0°C)                                 | NA            | –0.27       | –           | –           |
| Annual degree-days (5°C)                                 | NA            | –0.29       | –           | –           |
| Annual degree-days (10°C)                                | NA            | –0.29       | –           | –           |
| Annual degree-days (15°C)                                | NA            | –0.28       | –           | –           |
| Early spring degree-days (0°C)                           | NA            | –0.19       | –           | –           |
| Early spring degree-days (5°C)                           | NA            | –0.19       | –           | –           |
| Early spring degree-days (10°C)                          | NA            | –0.20       | –           | –           |
| Early spring degree-days (15°C)                          | NA            | –0.18       | –           | –           |
| SD in maximum temperature in early spring                | NA            | –0.10       | –           | –           |
| CV in maximum temperature in early spring                | NA            | 0.03        | –           | –           |
| Time between ice-out and sampling                        | NA            | 0.09        | –           | –           |

Supplemental Table S.C.8. Partial least-squares regression results for age-0 Yellow Perch CPUE in Lake of the Woods (WL = water level elevation; CV = coefficient of variation; NA = not applicable). Component loadings are equivalent to the correlation between the component and the individual variable. Loadings for components that did not improve the root mean square error (RMSE) or did not improve the percentage of variance explained in the response variables by over 5% are not shown.

| Variable                                                 | No components | Component 1 | Component 2 | Component 3 |
|----------------------------------------------------------|---------------|-------------|-------------|-------------|
| Cross-validation (RMSE, adjusted)                        | 1.03          | 1.01        | 1.23        | 1.29        |
| Cumulative percentage of variance explained (response)   | NA            | 39.6        | 47.8        | 58.5        |
| Cumulative percentage of variance explained (predictors) | NA            | 26.7        | 48.9        | 60.0        |
| <b>Component loadings</b>                                |               |             |             |             |
| Adult Walleye CPUE                                       | NA            | 0.23        | –           | –           |
| Age-1+ Walleye CPUE                                      | NA            | 0.15        | –           | –           |
| Annual minimum WL                                        | NA            | –0.16       | –           | –           |
| Annual WL rise                                           | NA            | –0.20       | –           | –           |
| Mean annual WL                                           | NA            | –0.29       | –           | –           |
| Annual SD in WL                                          | NA            | –0.18       | –           | –           |
| WL from the previous summer                              | NA            | 0.13        | –           | –           |
| Overwinter decline in WL                                 | NA            | 0.22        | –           | –           |
| Early spring increase in WL                              | NA            | –0.21       | –           | –           |
| Mean WL in early spring                                  | NA            | –0.22       | –           | –           |
| SD of WL in early spring                                 | NA            | –0.22       | –           | –           |
| CV in WL in early spring                                 | NA            | –0.22       | –           | –           |
| WL at ice-out                                            | NA            | –0.21       | –           | –           |
| Annual degree-days (0°C)                                 | NA            | 0.29        | –           | –           |
| Annual degree-days (5°C)                                 | NA            | 0.34        | –           | –           |
| Annual degree-days (10°C)                                | NA            | 0.36        | –           | –           |
| Annual degree-days (15°C)                                | NA            | 0.35        | –           | –           |
| Early spring degree-days (0°C)                           | NA            | 0.15        | –           | –           |
| Early spring degree-days (5°C)                           | NA            | 0.17        | –           | –           |
| Early spring degree-days (10°C)                          | NA            | 0.15        | –           | –           |
| Early spring degree-days (15°C)                          | NA            | 0.09        | –           | –           |
| SD in maximum temperature in early spring                | NA            | 0.06        | –           | –           |
| CV in maximum temperature in early spring                | NA            | –0.08       | –           | –           |
| Time between ice-out and sampling                        | NA            | –0.05       | –           | –           |



Supplemental Table S.C.9. Partial least-squares regression results for age-0 Yellow Perch CPUE in Leech Lake (WL = water level elevation; CV = coefficient of variation; NA = not applicable). Component loadings are equivalent to the correlation between the component and the individual variable. Loadings for components that did not improve the root mean square error (RMSE) or did not improve the percentage of variance explained in the response variables by over 5% are not shown.

| Variable                                                 | No components | Component 1 | Component 2 | Component 3 |
|----------------------------------------------------------|---------------|-------------|-------------|-------------|
| Cross-validation (RMSE, adjusted)                        | 1.03          | 1.09        | 1.03        | 1.01        |
| Cumulative percentage of variance explained (response)   | NA            | 47.7        | 75.1        | 80.8        |
| Cumulative percentage of variance explained (predictors) | NA            | 17.8        | 26.7        | 42.2        |
| <b>Component loadings</b>                                |               |             |             |             |
| Adult Walleye CPUE                                       | NA            | –           | –           | –           |
| Age-1+ Walleye CPUE                                      | NA            | –           | –           | –           |
| Annual minimum WL                                        | NA            | –           | –           | –           |
| Annual WL rise                                           | NA            | –           | –           | –           |
| Mean annual WL                                           | NA            | –           | –           | –           |
| Annual SD in WL                                          | NA            | –           | –           | –           |
| WL from the previous summer                              | NA            | –           | –           | –           |
| Overwinter decline in WL                                 | NA            | –           | –           | –           |
| Early spring increase in WL                              | NA            | –           | –           | –           |
| Mean WL in early spring                                  | NA            | –           | –           | –           |
| SD of WL in early spring                                 | NA            | –           | –           | –           |
| CV in WL in early spring                                 | NA            | –           | –           | –           |
| WL at ice-out                                            | NA            | –           | –           | –           |
| Annual degree-days (0°C)                                 | NA            | –           | –           | –           |
| Annual degree-days (5°C)                                 | NA            | –           | –           | –           |
| Annual degree-days (10°C)                                | NA            | –           | –           | –           |
| Annual degree-days (15°C)                                | NA            | –           | –           | –           |
| Early spring degree-days (0°C)                           | NA            | –           | –           | –           |
| Early spring degree-days (5°C)                           | NA            | –           | –           | –           |
| Early spring degree-days (10°C)                          | NA            | –           | –           | –           |
| Early spring degree-days (15°C)                          | NA            | –           | –           | –           |
| SD in maximum temperature in early spring                | NA            | –           | –           | –           |
| CV in maximum temperature in early spring                | NA            | –           | –           | –           |
| Time between ice-out and sampling                        | NA            | –           | –           | –           |

Supplemental Table S.C.10. Partial least-squares regression results for age-0 Yellow Perch CPUE in Rainy Lake (WL = water level elevation; CV = coefficient of variation; NA = not applicable). Component loadings are equivalent to the correlation between the component and the individual variable. Loadings for components that did not improve the root mean square error (RMSE) or did not improve the percentage of variance explained in the response variables by over 5% are not shown.

| Variable                                                 | No components | Component 1 | Component 2 | Component 3 |
|----------------------------------------------------------|---------------|-------------|-------------|-------------|
| Cross-validation (RMSE, adjusted)                        | 1.022         | 1.05        | 1.04        | 1.07        |
| Cumulative percentage of variance explained (response)   | NA            | 34.0        | 46.1        | 50.6        |
| Cumulative percentage of variance explained (predictors) | NA            | 20.6        | 38.8        | 56.4        |
| <b>Component loadings</b>                                |               |             |             |             |
| Adult Walleye CPUE                                       | NA            | –           | –           | –           |
| Age-1+ Walleye CPUE                                      | NA            | –           | –           | –           |
| Annual minimum WL                                        | NA            | –           | –           | –           |
| Annual WL rise                                           | NA            | –           | –           | –           |
| Mean annual WL                                           | NA            | –           | –           | –           |
| Annual SD in WL                                          | NA            | –           | –           | –           |
| WL from the previous summer                              | NA            | –           | –           | –           |
| Overwinter decline in WL                                 | NA            | –           | –           | –           |
| Early spring increase in WL                              | NA            | –           | –           | –           |
| Mean WL in early spring                                  | NA            | –           | –           | –           |
| SD of WL in early spring                                 | NA            | –           | –           | –           |
| CV in WL in early spring                                 | NA            | –           | –           | –           |
| WL at ice-out                                            | NA            | –           | –           | –           |
| Annual degree-days (0°C)                                 | NA            | –           | –           | –           |
| Annual degree-days (5°C)                                 | NA            | –           | –           | –           |
| Annual degree-days (10°C)                                | NA            | –           | –           | –           |
| Annual degree-days (15°C)                                | NA            | –           | –           | –           |
| Early spring degree-days (0°C)                           | NA            | –           | –           | –           |
| Early spring degree-days (5°C)                           | NA            | –           | –           | –           |
| Early spring degree-days (10°C)                          | NA            | –           | –           | –           |
| Early spring degree-days (15°C)                          | NA            | –           | –           | –           |
| SD in maximum temperature in early spring                | NA            | –           | –           | –           |
| CV in maximum temperature in early spring                | NA            | –           | –           | –           |
| Time between ice-out and sampling                        | NA            | –           | –           | –           |

Supplemental Table S.C.11. Partial least-squares regression results for age-0 Yellow Perch CPUE in Lake Vermilion (WL = water level elevation; CV = coefficient of variation; NA = not applicable). Component loadings are equivalent to the correlation between the component and the individual variable. Loadings for components that did not improve the root mean square error (RMSE) or did not improve the percentage of variance explained in the response variables by over 5% are not shown.

| Variable                                                 | No components | Component 1 | Component 2 | Component 3 |
|----------------------------------------------------------|---------------|-------------|-------------|-------------|
| Cross-validation (RMSE, adjusted)                        | 1.035         | 0.92        | 0.77        | 0.88        |
| Cumulative percentage of variance explained (response)   | NA            | 60.8        | 76.0        | 88.1        |
| Cumulative percentage of variance explained (predictors) | NA            | 20.5        | 44.0        | 50.3        |
| <b>Component loadings</b>                                |               |             |             |             |
| Adult Walleye CPUE                                       | NA            | 0.15        | −0.11       | —           |
| Age-1+ Walleye CPUE                                      | NA            | 0.05        | −0.12       | —           |
| Annual minimum WL                                        | NA            | 0.25        | −0.07       | —           |
| Annual WL rise                                           | NA            | −0.40       | 0.22        | —           |
| Mean annual WL                                           | NA            | −0.24       | 0.21        | —           |
| Annual SD in WL                                          | NA            | −0.40       | 0.19        | —           |
| WL from the previous summer                              | NA            | 0.03        | −0.33       | —           |
| Overwinter decline in WL                                 | NA            | 0.26        | −0.21       | —           |
| Early spring increase in WL                              | NA            | −0.18       | 0.07        | —           |
| Mean WL in early spring                                  | NA            | −0.29       | 0           | —           |
| SD of WL in early spring                                 | NA            | −0.17       | 0.07        | —           |
| CV in WL in early spring                                 | NA            | −0.17       | 0.07        | —           |
| WL at ice-out                                            | NA            | −0.32       | 0           | —           |
| Annual degree-days (0°C)                                 | NA            | −0.35       | 0.16        | —           |
| Annual degree-days (5°C)                                 | NA            | −0.32       | 0.16        | —           |
| Annual degree-days (10°C)                                | NA            | −0.30       | 0.13        | —           |
| Annual degree-days (15°C)                                | NA            | −0.25       | 0.08        | —           |
| Early spring degree-days (0°C)                           | NA            | −0.19       | 0.39        | —           |
| Early spring degree-days (5°C)                           | NA            | −0.07       | 0.44        | —           |
| Early spring degree-days (10°C)                          | NA            | 0           | 0.42        | —           |
| Early spring degree-days (15°C)                          | NA            | 0.1         | 0.36        | —           |
| SD in maximum temperature in early spring                | NA            | −0.11       | −0.12       | —           |
| CV in maximum temperature in early spring                | NA            | −0.21       | −0.28       | —           |
| Time between ice-out and sampling                        | NA            | 0.12        | −0.26       | —           |

Supplemental Table S.C.12. Partial least-squares regression results for age-0 Yellow Perch CPUE in Lake Winnibigoshish (WL = water level elevation; CV = coefficient of variation; NA = not applicable). Component loadings are equivalent to the correlation between the component and the individual variable. Loadings for components that did not improve the root mean square error (RMSE) or did not improve the percentage of variance explained in the response variables by over 5% are not shown.

| Variable                                                 | No components | Component 1 | Component 2 | Component 3 |
|----------------------------------------------------------|---------------|-------------|-------------|-------------|
| Cross-validation (RMSE, adjusted)                        | 1.05          | 1.24        | 1.44        | 1.39        |
| Cumulative percentage of variance explained (response)   | NA            | 54.5        | 70.5        | 89.9        |
| Cumulative percentage of variance explained (predictors) | NA            | 24.5        | 51.6        | 69.6        |
| <b>Component loadings</b>                                |               |             |             |             |
| Adult Walleye CPUE                                       | NA            | –           | –           | –           |
| Age-1+ Walleye CPUE                                      | NA            | –           | –           | –           |
| Annual minimum WL                                        | NA            | –           | –           | –           |
| Annual WL rise                                           | NA            | –           | –           | –           |
| Mean annual WL                                           | NA            | –           | –           | –           |
| Annual SD in WL                                          | NA            | –           | –           | –           |
| WL from the previous summer                              | NA            | –           | –           | –           |
| Overwinter decline in WL                                 | NA            | –           | –           | –           |
| Early spring increase in WL                              | NA            | –           | –           | –           |
| Mean WL in early spring                                  | NA            | –           | –           | –           |
| SD of WL in early spring                                 | NA            | –           | –           | –           |
| CV in WL in early spring                                 | NA            | –           | –           | –           |
| WL at ice-out                                            | NA            | –           | –           | –           |
| Annual degree-days (0°C)                                 | NA            | –           | –           | –           |
| Annual degree-days (5°C)                                 | NA            | –           | –           | –           |
| Annual degree-days (10°C)                                | NA            | –           | –           | –           |
| Annual degree-days (15°C)                                | NA            | –           | –           | –           |
| Early spring degree-days (0°C)                           | NA            | –           | –           | –           |
| Early spring degree-days (5°C)                           | NA            | –           | –           | –           |
| Early spring degree-days (10°C)                          | NA            | –           | –           | –           |
| Early spring degree-days (15°C)                          | NA            | –           | –           | –           |
| SD in maximum temperature in early spring                | NA            | –           | –           | –           |
| CV in maximum temperature in early spring                | NA            | –           | –           | –           |
| Time between ice-out and sampling                        | NA            | –           | –           | –           |
